# Supplementary material
Source: publisher figshare collection journal article supplement (https://gsajournals.figshare.com/ndownloader/files/13792070)
Supplement: Supplementary file 1 [file 13792070]

gene	Gene	character_major	Trait	chr	L	R	locus_id	browse	isolation	objective	doi
dwarf 18	d18	Morphological trait	Dwarf	1	20.63789738	20.63904088	Os01g0177400	-	Natural variation	Dwarfism. Gibberellin biosynthesis.	10.1073/pnas.141239398
dwarf18	d18	Morphological trait	Dwarf	1	20.63789738	20.63904088	Os01g0177400	-	Natural variation	Dwarfism. Gibberellin biosynthesis.	10.1270/jsbbs.52.215
Grain number 1a	Gn1a	Morphological trait	Panicle flower	1	28.28696264	28.34618773	Os01g0197700	-	Natural variation	Grain number. Cytokinin catabolism.	10.1126/science.1113373
DOPPELGANGER1	DPL1	Physiological trait	Sterility	1	46.16078266	46.16520237	Os01g0258600	-	Natural variation	Hybrid sterility. Pollen germination. Interaction with DPL2	10.1073/pnas.1003124107
shoot K content 1	SKC1	Resistance or Tolerance	Salinity tolerance	1	62.6331595	62.64966775	Os01g0307500	-	Natural variation	Regulation of K+/Na+ homeostasis under salt stress.	10.1038/ng1643
Promoter of Shoot Regeneration 1	PSR	Others	Others	1	73.25984615	73.28361912	Os01g0357100	-	Natural variation	Shoot regeneration. Nitrate assimilation.	10.1073/pnas.0504220102
SaF	SaF	Physiological trait	Sterility	1	100.4927009	100.5039462	Os01g0578500	-	Natural variation	Hybrid male sterility. Pollen development. Interaction with SaM	10.1073/pnas.0810108105
SaM	SaM	Physiological trait	Sterility	1	100.5153214	100.5401039	Os01g0578700	-	Natural variation	Hybrid male sterility. Pollen development. Interaction with SaF	10.1073/pnas.0810108105
Rd	Rd	Morphological trait	Seed	1	114.7969307	114.804348	Os01g0633500	-	Natural variation	Pericarp color. Proanthocyanidin biosynthesis.	10.1111/j.1365-313X.2006.02958.x
Pi37	Pi37	Resistance or Tolerance	Blast resistance	1	140.9392722	140.9474682	Os01g0781700	-	Natural variation	Blast resistance.	10.1534/genetics.107.080648
QTL of seed shattering in chromosome 1	qSH1	Morphological trait	Panicle flower	1	149.4732954	149.4902176	Os01g0848400	-	Natural variation	Seed shattering.	10.1126/science.1126410
Nonphotochemical quenching	qNPQ1-2	Physiological trait	Source activity	1	158.2076937	158.2133009	Os01g0869800	-	Natural variation	Nonphotochemical quenching capacity. Protection from photoinhibition.	10.1073/pnas.1104809108
semi-dwarf 1	sd1	Morphological trait	Dwarf	1	159.7955114	159.8073348	Os01g0883800	-	Natural variation	Semi-dwarf. Gibberellin biosynthesis.	10.1038/416701a
Grain weight 2	GW2	Morphological trait	Seed	2	38.33295221	38.37004039	Os02g0244100	-	Natural variation	Grain width and weight.	10.1038/ng2014
Rf2	Rf2	Physiological trait	Sterility	2	49.33088577	49.35292412	Os02g0274000	-	Natural variation	Lead Rice-type cytoplasmic male sterility.	10.1111/j.1365-313X.2010.04427.x
hybrid breakdown 2	hbd2	Physiological trait	Lethality	2	105.545138	105.59	Os02g0622100	-	Natural variation	Hybrid weakness. Growth retardation. Interaction wiith hbd3.	10.1007/s00438-010-0514-y
Pib	Pib	Resistance or Tolerance	Blast resistance	2	161.49	161.49	Os02g0818450	-	Natural variation	Resistance to Magnaporthe grisea.	10.1046/j.1365-313X.1999.00498.x
QTL of low-temperature germinability in chromosome3 -1	qLTG3?1	Resistance or Tolerance	Cold tolerance	3	0.844442601	0.846337923	Os03g0103300	-	Natural variation	Cold tolerance at germination stage.	10.1073/pnas.0805303105
QTL of low-temperature germinability in chromosome3 -1	qLTG3?1	Physiological trait	Germination dormancy	3	0.844442601	0.846337923	Os03g0103300	-	Natural variation	Cold tolerance at germination stage.	10.1073/pnas.0805303105
days to heading on chromosome 3	dth3	Physiological trait	Flowering	3	6.280072629	6.557209071	Os03g0122600	-	Natural variation	Flowering time independent of day length.	10.1007/s00299-011-1129-4
Grain size 3	GS3	Morphological trait	Seed	3	85.15260227	85.1619721	Os03g0407400	-	Natural variation	Grain size.	10.1007/s00122-006-0218-1
GRAIN SIZE 3	GS3	Morphological trait	Panicle flower	3	85.15260227	85.1619721	Os03g0407400	-	Natural variation	Stigma exsertion.	10.1270/jsbbs.61.244
Gly-rich protein encoding 162 amino acids	GRP162	Physiological trait	Sterility	3	101.9475964	101.9748852	Os03g0641300	-	Natural variation	Hong-Lian cytoplasmic male sterility.	10.1105/tpc.111.093211
Lipoxygenase-3	LOX-3	Physiological trait	Eating quality	3	128.2090101	128.2237209	Os03g0700400	-	Natural variation	Stale flavor generation.	10.1270/jsbbs.58.169
heading date 6	Hd6	Physiological trait	Flowering	3	146.6350511	146.6412558	Os03g0762000	-	Natural variation	Flowering time.	10.1073/pnas.111136798
Bph1	Bph14	Resistance or Tolerance	Insect resistance	3	165.83	165.83	Os03g0848700	-	Natural variation	Brown planthopper resistance.	10.1073/pnas.0912139106
S28	S28	Physiological trait	Sterility	4	26.5017201	26.5020781	Os04g0321500	-	Natural variation	Hybrid sterility between Oryza sativa and Oryza glaberrima. Pollen development. Interaction with S27	10.1073/pnas.0908283107
Pi21	Pi21	Resistance or Tolerance	Blast resistance	4	58.71011909	58.73580133	Os04g0401000	-	Natural variation	Resistance to Magnaporthe oryzae.	10.1126/science.1175550
GRAIN INCOMPLETE FILLING 1	GIF1	Morphological trait	Seed	4	61.73917912	61.74707523	Os04g0413500	-	Natural variation	Grain filling. Grain size.	10.1038/ng.220
Rf17	Rf17	Physiological trait	Sterility	4	76.92086378	76.92681156	Os04g0475900	-	Natural variation	Chinese wild rice-type cytoplasmic male sterility.	10.1073/pnas.0901860106
boron excess tolerant 1	BET1	Resistance or Tolerance	Other soil stress tolerance	4	77.31760564	77.32919495	Os04g0477300	-	Natural variation	Boron toxicity tolerance.	10.1104/pp.110.171470
-	OSB2	Others	Others	4	93.25482309	93.43201689	Os04g0557500	-	Natural variation	Purple leaf. Anthocyanin biosynthesis.	10.1093/pcp/pce128
-	OSB1	Others	Others	4	93.50441895	93.55044609	Os04g0557800	-	Natural variation	Purple leaf. Anthocyanin biosynthesis.	10.1093/pcp/pce128
Xa1	Xa1	Resistance or Tolerance	Bacterial blight resistance	4	112.8140314	112.8391036	Os04g0622600	-	Natural variation	Resistance to Xanthomonas oryzae pv. oryzae.	10.1073/pnas.95.4.1663
seed shattering 4	sh4	Morphological trait	Panicle flower	4	130.2174082	130.2192301	Os04g0670900	-	Natural variation	Seed shattering.	10.1126/science.1123604
Xa5	Xa5	Resistance or Tolerance	Bacterial blight resistance	5	2.25	2.286573657	Os05g0107700	-	Natural variation	Resistance to Xanthomonas oryzae pv. oryzae.	10.1094/MPMI.2004.17.12.1348
Grain size 5	GS5	Morphological trait	Seed	5	26.5619109	26.59536836	Os05g0158500	-	Natural variation	Grain size.	10.1038/ng.977
Grain weight 5	GW5	Morphological trait	Seed	5	34.55510417	34.57117327	DQ991205	-	Natural variation	Grain size.	10.1038/cr.2008.307
QTL for seed width on chromosome 5	qSW5	Morphological trait	Seed	5	34.55510417	34.57117327	AB433345_DQ991205	-	Natural variation	Grain size.	10.1038/ng.169
waxy	wx	Physiological trait	Eating quality	6	9.41	9.433792598	Os06g0133000	-	Natural variation	Seed amylose content.	10.1046/j.1365-313X.1995.7040613.x
heading date 3a	Hd3a	Physiological trait	Flowering	6	13.11999216	13.12807104	Os06g0157700	-	Natural variation	Flowering time under short day condition.	10.1093/pcp/pcf156
DOPPELGANGER2	DPL2	Physiological trait	Sterility	6	16.80485604	16.80656962	Os06g0184100	-	Natural variation	Hybrid sterility. Pollen germination. Interaction with DPL1	10.1073/pnas.1003124107
S5	S5	Physiological trait	Sterility	6	33.50580935	33.51635673	Os06g0213100	-	Natural variation	Single locus hybrid sterility.	10.1073/pnas.0804761105
AMYLOPECTIN CHAIN-LENGTH	ALK	Physiological trait	Eating quality	6	38.69125985	38.73811741	Os06g0229800	-	Natural variation	Gelatinization temperature. Gel consistency.	10.1111/j.1744-7909.2011.01065.x
heading date 1	Hd1	Physiological trait	Flowering	6	55.40666077	55.41312693	Os06g0275000	-	Natural variation	Flowering time.	10.1105/tpc.12.12.2473
Pi2	Pi2	Resistance or Tolerance	Blast resistance	6	60.79830098	60.8089954	Os06g0286700	-	Natural variation	Resistance to Magnaporthe grisea.	10.1094/MPMI-19-1216
Pi9	Pi9	Resistance or Tolerance	Blast resistance	6	60.79830098	60.8089954	Os06g0286700	-	Natural variation	Resistance to Magnaporthe grisea.	10.1534/genetics.105.044891
Pi25	Pi25	Resistance or Tolerance	Blast resistance	6	66.26521519	66.26589625	Os06g0330100	-	Natural variation	Resistance to Magnaporthe oryzae.	10.1016/j.jgg.2011.03.010
Pid3	Pid3	Resistance or Tolerance	Blast resistance	6	66.26521519	66.26589625	Os06g0330100	-	Natural variation	Resistance to Magnaporthe oryzae.	10.1534/genetics.109.102871
Pi-d2	Pi-d2	Resistance or Tolerance	Blast resistance	6	67.81350244	67.82294796	Os06g0494100	-	Natural variation	Resistance to Magnaporthe grisea.	10.1111/j.1365-313X.2006.02739.x
Xa27	Xa27	Resistance or Tolerance	Bacterial blight resistance	6	92.51570506	92.55098951	Os06g0598900	-	Natural variation	Resistance to Xanthomonas oryzae pv. oryzae.	10.1038/nature03630
STRONG CULM 2	SCM2	Morphological trait	Culm leaf	6	114.1684498	114.169568	Os06g0665400	-	Natural variation	Grain number. Culm mechanical strength. Culm size.	10.1038/ncomms1132
STRONG CULM 2	SCM2	Resistance or Tolerance	Lodging resistance	6	114.1684498	114.169568	Os06g0665400	-	Natural variation	Grain number. Culm mechanical strength. Culm size.	10.1038/ncomms1132
STRONG CULM 2	SCM2	Morphological trait	Panicle flower	6	114.1684498	114.169568	Os06g0665400	-	Natural variation	Grain number. Culm mechanical strength. Culm size.	10.1038/ncomms1132
PROSTRATE GROWTH 1	PROG1	Morphological trait	Culm leaf	7	19.35523894	19.37321275	Os07g0153600	-	Natural variation	Tiller angle.	10.1038/ng.197
PROSTRATE GROWTH 1	PROG1	Morphological trait	Culm leaf	7	19.35523894	19.37321275	Os07g0153600	-	Natural variation	Tiller angle.	10.1038/ng.247
Rc	Rc	Morphological trait	Seed	7	43.92042697	43.93445864	Os07g0211500	-	Natural variation	Red pericarp.	10.1105/tpc.105.038430
QTL for seed dormancy (qSD7-1) and pericarp color (qPC7)	qSD7-1/qPC7	Physiological trait	Germination dormancy	7	43.92042697	43.93445864	Os07g0211500	-	Natural variation	Seed dormancy. Red pericarp.	10.1534/genetics.111.131169
QTL for seed dormancy (qSD7-1) and pericarp color (qPC7)	qSD7-1/qPC7	Morphological trait	Seed	7	43.92042697	43.93445864	Os07g0211500	-	Natural variation	Seed dormancy. Red pericarp.	10.1534/genetics.111.131169
-	OsHMA3	Resistance or Tolerance	Other soil stress tolerance	7	46.87420507	46.88130614	Os07g0232900	-	Natural variation	Cadmium accumulation. Translocation of Cd from root to shoot.	10.1073/pnas.1005396107
-	qCDT7	Resistance or Tolerance	Other soil stress tolerance	7	46.87420507	46.88130614	Os07g0232900	-	Natural variation	Cadmium accumulation. Translocation of Cd from root to shoot.	10.1111/j.1469-8137.2010.03459.x
&quot;grain number, plant height and heading date 7&quot;	Ghd7	Physiological trait	Flowering	7	49.86366689	49.86714623	Os07g0261200	-	Natural variation	Flowering time under long day condition.	10.1038/ng.143
Seed dormancy 4	Sdr4	Physiological trait	Germination dormancy	7	85.83	85.83587355	Os07g0585700	-	Natural variation	Seed dormancy.	10.1073/pnas.0911965107
Pi36	Pi36	Resistance or Tolerance	Blast resistance	8	24.99714679	25.01326684	Os08g0150100	-	Natural variation	Resistance to Magnaporthe oryzae.	10.1534/genetics.107.075465
days to heading on chromosome 8	DTH8	Physiological trait	Flowering	8	35.75946476	35.76618707	Os08g0174500	-	Natural variation	Flowering time under long day condition.	10.1104/pp.110.156943
&quot;grain number, plant height and heading date 8&quot;	Ghd8	Physiological trait	Flowering	8	35.75946476	35.76618707	Os08g0174500	-	Natural variation	Promotion of flowering time under short day condition. Delay of flowering time under long day condition.	10.1093/mp/ssq070
S27-1	S27-1	Physiological trait	Sterility	8	69.83673206	69.84417168	Os08g0404200	-	Natural variation	Hybrid sterility between Oryza sativa and Oryza glaberrima. Pollen development. Interaction with S28	10.1073/pnas.0908283107
S27-2	S27-2	Physiological trait	Sterility	8	69.86020294	69.89183454	Os08g0404300	-	Natural variation	Hybrid sterility between Oryza sativa and Oryza glaberrima. Pollen development. Interaction with S28	10.1073/pnas.0908283107
betaine aldehyde dehydrogenase2	Badh2	Physiological trait	Eating quality	8	74.87240171	74.91591124	Os08g0424500	-	Natural variation	Fragrance rice. 2-acetyl-1-pyrroline biosynthesis.	10.1105/tpc.108.058917
WEALTHY FARMER?�S PANICLE	WFP	Morphological trait	Culm leaf	8	104.8685952	104.8843209	Os08g0509600	-	Natural variation	Panicle branching. Tillering.	10.1038/ng.592
WEALTHY FARMER?�S PANICLE	WFP	Morphological trait	Panicle flower	8	104.8685952	104.8843209	Os08g0509600	-	Natural variation	Panicle branching. Tillering.	10.1038/ng.592
ideal plant architecture	IPA1	Morphological trait	Culm leaf	8	104.8685952	104.8843209	Os08g0509600	-	Natural variation	Panicle branching. Tillering. Culm mechanical strength.	10.1038/ng.591
ideal plant architecture	IPA1	Resistance or Tolerance	Lodging resistance	8	104.8685952	104.8843209	Os08g0509600	-	Natural variation	Panicle branching. Tillering. Culm mechanical strength.	10.1038/ng.591
ideal plant architecture	IPA1	Morphological trait	Panicle flower	8	104.8685952	104.8843209	Os08g0509600	-	Natural variation	Panicle branching. Tillering. Culm mechanical strength.	10.1038/ng.591
xa13	xa13	Resistance or Tolerance	Bacterial blight resistance	8	112.6855187	112.6979319	Os08g0535200	-	Natural variation	Resistance to Xanthomonas oryzae pv. oryzae. Pollen development.	10.1101/gad.1416306
xa13	xa13	Physiological trait	Sterility	8	112.6855187	112.6979319	Os08g0535200	-	Natural variation	Resistance to Xanthomonas oryzae pv. oryzae. Pollen development.	10.1101/gad.1416306
Submergence 1A	Sub1A	Resistance or Tolerance	Submergency tolerance	9	12.37483033	13.08573334	AAZ06207	-	Natural variation	Submergence tolerance.	10.1038/nature04920
Pi5-1	Pi5-1	Resistance or Tolerance	Blast resistance	9	35.00787423	35.02105688	Os09g0327600	-	Natural variation	Resistance to Magnaporthe oryzae.	10.1534/genetics.108.099226
dense and erect panicle 1	DEP1	Morphological trait	Panicle flower	9	63.79363378	63.80828179	Os09g0441900	-	Natural variation	Dense and erect panicle.	10.1038/ng.352
Tiller Angle Control 1	TAC1	Morphological trait	Culm leaf	9	89.96643928	89.9952185	Os09g0529300	-	Natural variation	Tiller angle.	10.1111/j.1365-313X.2007.03284.x
CPDphotolyase	CPDphotolyase	Resistance or Tolerance	Other stress resistance	10	10.55296114	10.56081547	Os10g0167600	-	Natural variation	UV tolerance.	10.1093/pcp/pch215
CPDphotolyase	CPDphotolyase	Resistance or Tolerance	Other stress resistance	10	10.55296114	10.56081547	Os10g0167600	-	Natural variation	UV tolerance.	10.1111/j.1365-313X.2005.02428.x
QTL for ultraviolet-B resistance on chromosome 10	qUVR-10	Resistance or Tolerance	Other stress resistance	10	10.55296114	10.56081547	Os10g0167600	-	Natural variation	UV tolerance.	10.1534/genetics.105.044735
Early heading date 1	Ehd1	Physiological trait	Flowering	10	46.58709497	46.59559566	Os10g0463400	-	Natural variation	Flowering time independent of day length.	10.1101/gad.1189604
RF1A	RF1A	Physiological trait	Sterility	10	56.85919653	57.01538552	Os10g0497300	-	Natural variation	Boro II cytoplasmic male sterility.	10.1105/tpc.105.038240
fertility restorer gene 5	Rf5	Physiological trait	Sterility	10	56.85919653	57.01538552	Os10g0497300	-	Natural variation	Hong-Lian cytoplasmic male sterility.	10.1105/tpc.111.093211
Rf-1	Rf-1	Physiological trait	Sterility	10	56.96481456	56.97894679	Os10g0497432	-	Natural variation	Boro II cytoplasmic male sterility.	10.1046/j.1365-313X.2003.01961.x
RF1B	RF1B	Physiological trait	Sterility	10	57.68106403	57.69977681	Os10g0499500	-	Natural variation	Boro II cytoplasmic male sterility.	10.1105/tpc.105.038240
Pia	Pia	Resistance or Tolerance	Blast resistance	11	34.64875963	34.66784562	Os11g0225100	-	Natural variation	Resistance to Magnaporthe oryzae carrying AVR-Pia	10.1111/j.1365-313X.2011.04502.x
Pia	Pia	Resistance or Tolerance	Blast resistance	11	34.70721308	34.74069612	Os11g0225300	-	Natural variation	Resistance to Magnaporthe oryzae carrying AVR-Pia	10.1111/j.1365-313X.2011.04502.x
Xa21	Xa21	Resistance or Tolerance	Bacterial blight resistance	11	91.01833955	91.05	Os11g0559200	-	Natural variation	Bacterial blight resistance.	10.1126/science.270.5243.1804
Pb1	Pb1	Resistance or Tolerance	Blast resistance	11	102.0904432	102.1211737	Os11g0598500	-	Natural variation	Blast resistance.	10.1111/j.1365-313X.2010.04348.x
Pik1	Pik1	Resistance or Tolerance	Blast resistance	11	118.47	118.47	Os11g0687800	-	Natural variation	Blast resistance.	10.1111/j.1469-8137.2010.03462.x
Pik2	Pik2	Resistance or Tolerance	Blast resistance	11	118.47	118.47	Os11g0687900	-	Natural variation	Blast resistance.	10.1111/j.1469-8137.2010.03462.x
Pikm	Pikm	Resistance or Tolerance	Blast resistance	11	118.47	118.47	Os11g0689000	-	Natural variation	Blast resistance.	10.1534/genetics.108.095034
Pik-p	Pik-p	Resistance or Tolerance	Blast resistance	11	118.47	118.47	Os11g0689100	-	Natural variation	Blast resistance.	10.1007/s00122-010-1506-3
Xa3	Xa3	Resistance or Tolerance	Bacterial blight resistance	11	118.47	118.47	Os11g0692300	-	Natural variation	Bacterial blight resistance.	10.1007/s00122-006-0388-x
Xa26	Xa26	Resistance or Tolerance	Bacterial blight resistance	11	118.47	118.47	Os11g0692300	-	Natural variation	Resistance to Xanthomonas oryzae pv. oryzae.	10.1046/j.1365-313X.2003.01976.x
Pi-ta	Pi-ta	Resistance or Tolerance	Blast resistance	12	44.57026931	44.58211231	Os12g0281300	-	Natural variation	Resistance to Magnaporthe grisea.	10.1105/tpc.12.11.2033
long-day?specific male-fertility?associated RNA	LDMAR	Physiological trait	Sterility	12	72.61926569	72.63152071	JQ317784	-	Natural variation	Photoperiod-sensitive male sterility.	10.1073/pnas.1121374109
SNORKEL2	SK2	Resistance or Tolerance	Submergency tolerance	12	95.32316742	95.59500415	AB510479	-	Natural variation	Internode elongation in response to deep water.	10.1038/nature08258
SNORKEL1	SK1	Resistance or Tolerance	Submergency tolerance	12	95.96568464	96.09979548	AB510478	-	Natural variation	Internode elongation in response to deep water.	10.1038/nature08258
Heading date 17	Hd17	Physiological trait	Flowering	6	11.73	11.73777362	Os06g0142600	-	Natural variation	Flowering time under long day condition.	10.1093/pcp/pcs028
ORF3	ORF3	Physiological trait	Sterility	6	33.42239122	33.43402039	Os06g0212900	-	Natural variation	Single locus hybrid sterility. S5.	10.1126/science.1223702
ORF4	ORF4	Physiological trait	Sterility	6	33.49211443	33.50096434	Os06g0213000	-	Natural variation	Single locus hybrid sterility. S5.	10.1126/science.1223702
qGW8	qGW8	Morphological trait	Seed	8	111.7044229	111.726341	Os08g0531600	-	Natural variation	Grain size.	10.1038/ng.2327
phosphorus-starvation tolerance 1	PSTOL1	Resistance or Tolerance	Other soil stress tolerance	12	50.45205809	50.88602207	BAK26566	-	Natural variation	Phosphate uptake.	10.1038/nature11346
photo- or thermo-sensitive genic male sterility locus on chromosome 12	p/tms12-1	Physiological trait	Sterility	12	72.62699578	72.62720417	smRNA615912	-	Natural variation	Photoperiod- and thermo-sensitive genic male sterility.	10.1038/cr.2012.28
siRNA-long-day?specific male-fertility?associated RNA	Psi?LDMAR	Physiological trait	Sterility	12	72.55521277	72.62034731	Os12g0545900	-	Natural variation	Photoperiod-sensitive male sterility	10.1093/mp/sss095
Submergence 1A	Sub1A	Physiological trait	Source activity	9	12.37483033	13.08573334	AAZ06207	-	Natural variation	&quot;Leaf senescence induced by darkness, JA, and SA.&quot;	10.1104/pp.112.207738
Submergence 1A	Sub1A	Resistance or Tolerance	Other stress resistance	9	12.37483033	13.08573334	AAZ06207	-	Natural variation	&quot;Leaf senescence induced by darkness, JA, and SA.&quot;	10.1104/pp.112.207738
qGL3	qGL3	Morphological trait	Seed	3	106.5850657	106.5950871	Os03g0646900	-	Natural variation	Grain length. 1000-grain weight.	10.1073/pnas.1219776110
Days to heading on chromosome 2	DTH2	Physiological trait	Flowering	2	132.4478684	132.4571843	Os02g0724000	-	Natural variation	Flowering time under long day condition. Seed maturity.	10.1073/pnas.1213962110
Lipoxygenase 3	LOX3	Physiological trait	Germination dormancy	3	128.2090101	128.2237209	Os03g0700400	-	Natural variation	Germination rate. Seed longevity.	10.1007/s12374-013-0085-7
depilous	dep	Morphological trait	Seed	5	7.123826111	7.152640379	Os05g0118700	-	Natural variation	Trichome formation.	10.1186/1939-8433-5-28
depilous	dep	Morphological trait	Culm leaf	5	7.123826111	7.152640379	Os05g0118700	-	Natural variation	Trichome formation.	10.1186/1939-8433-5-28
grain length 3.1	GL3.1	Morphological trait	Seed	3	106.8313815	106.9029819	LOC_Os03g44510	-	Natural variation	Grain size.	10.1038/cr.2012.151
liguleless 1	OsLG1	Morphological trait	Panicle flower	4	124.0229747	124.0399411	Os04g0656500	-	Natural variation	Closed panicle.	10.1038/ng.2567
THOUSAND-GRAIN WEIGHT 6	TGW6	Morphological trait	Seed	6	99.90610429	99.91455198	Os06g0623700	-	Natural variation	Grain size. Grain yield.	10.1038/ng.2612
DEEPER ROOTING 1	Dro1	Morphological trait	Root	9	63.68040178	63.68282431	Os09g0439800	-	Natural variation	Root growth angle. Drought avoidance	10.1038/ng.2725
DEEPER ROOTING 1	Dro1	Resistance or Tolerance	Drought tolerance	9	63.68040178	63.68282431	Os09g0439800	-	Natural variation	Root growth angle. Drought avoidance	10.1038/ng.2725
GREEN FOR PHOTOSYNTHESIS	GPS	Physiological trait	Source activity	4	110.2889575	110.3045375	Os04g0615000	-	Natural variation	Photosynthetic capacity.	10.1038/srep02149
Heading date 16	Hd16	Physiological trait	Flowering	3	152.6381406	152.6480301	Os03g0793500	-	Natural variation	Flowering time.	10.1111/tpj.12268
RICE FLOWERING LOCUS T 1	RFT1	Physiological trait	Flowering	6	13.07518877	13.0811632	Os06g0157500	-	Natural variation	Flowering time.	10.1371/journal.pone.0075959
Black hull4	Bh4	Morphological trait	Seed	4	72.59486139	72.62629307	Os04g0460000	-	Natural variation	Seed hull color.	10.1104/pp.110.168500
Awn-1	An-1	Morphological trait	Seed	4	34.33828149	34.36003797	Os04g0350700	-	Natural variation	Awn formation. Grain length. Grain number.	10.1105/tpc.113.113589
Awn-1	An-1	Morphological trait	Panicle flower	4	34.33828149	34.36003797	Os04g0350700	-	Natural variation	Awn formation. Grain length. Grain number.	10.1105/tpc.113.113589
Oryza sativa Pseudo-Response Regulator37	OsPRR37	Physiological trait	Flowering	7	119.54	119.54	Os07g0695100	-	Natural variation	Flowering time.	10.1093/mp/sst088
SPIKELET NUMBER	SPIKE	Morphological trait	Panicle flower	4	110.2889575	110.3045375	Os04g0615000	-	Natural variation	Grain number. Leaf size. Culm size.	10.1073/pnas.1310790110
SPIKELET NUMBER	SPIKE	Morphological trait	Culm leaf	4	110.2889575	110.3045375	Os04g0615000	-	Natural variation	Grain number. Leaf size. Culm size.	10.1073/pnas.1310790110
enhancing biomass and spikelet number	OsEBS	Morphological trait	Dwarf	5	120.7469776	120.7539246	Os05g0591400	-	Natural variation	Plant height. Leaf size. Grain number.	10.1111/pbi.12097
enhancing biomass and spikelet number	OsEBS	Morphological trait	Culm leaf	5	120.7469776	120.7539246	Os05g0591400	-	Natural variation	Plant height. Leaf size. Grain number.	10.1111/pbi.12097
enhancing biomass and spikelet number	OsEBS	Morphological trait	Panicle flower	5	120.7469776	120.7539246	Os05g0591400	-	Natural variation	Plant height. Leaf size. Grain number.	10.1111/pbi.12097
thermo-sensitive genic male sterility 9-1	TMS 9-1(OsMS1)	Physiological trait	Sterility	9	65.11907212	65.12080861	Os09g0449000	-	Natural variation	pollen fertility	10.1007/s00122-014-2289-8
NAC domain-containing protein 32	NAC32	Resistance or Tolerance	Salinity tolerance	2	159.912914	159.9239752	Os02g0810900	-	Natural variation	regulation of NaCl stress responses	10.1007/s11738-014-1569-x
NAC domain-containing protein	NAC	Resistance or Tolerance	Salinity tolerance	12	0	0	LOC_Os12g07790	-	Natural variation	regulation of NaCl stress responses	10.1007/s11738-014-1569-x
DEEPER ROOTING 1	DRO1	Physiological trait	Seed	9	63.68282431	63.68040178	Os09g0439800	-	Natural variation	rice yield by enhancing nitrogen uptake and cytokinin fluxes	10.1038/srep05563
DEEPER ROOTING 1	DRO1	Morphological trait	Root	9	63.68282431	63.68040178	Os09g0439800	-	Natural variation	root length density	10.1038/srep05563
Submergence 1A	SUB1A	Morphological trait	Culm leaf	9	12.37483033	13.08573334	AAZ06207	-	Natural variation	&quot;shoot growth, number of internodes&quot;	10.1007/s00425-014-2100-8
autoinhibited calcium ATPase 4	OsCAX4	Resistance or Tolerance	Salinity tolerance	2	11.95436158	11.96848588	Os02g0138900	-	Natural variation	salinity tolerance	10.1007/s00709-014-0615-2
Ca2+/H+ exchanger 4	OsACA4	Resistance or Tolerance	Salinity tolerance	11	8.539966673	8.562745058	Os11g0140400	-	Natural variation	salinity tolerance	10.1007/s00709-014-0615-2
Al transporter	Nrat1	Resistance or Tolerance	Other stress resistance	2	8.88146541	8.863797905	Os02g0131800	-	Natural variation	aluminium (Al) tolerance	10.1093/jxb/eru201
cinnamyl-alcohol dehydrogenase 2	OsCAD2	Morphological trait	Culm leaf	2	24.467939	24.44969592	Os02g0187800	-	Natural variation	&quot;culm stiffness, culm strength, lignin concentrations of cell walls &quot;	10.1038/srep06567
sulfotransferase	OsSOT1(STV11)	Resistance or Tolerance	Other disease resistance	11	80.71876332	80.71949947	Os11g0505200	-	Natural variation	&quot;resistant to Rice Stripe Virus (RSV) by triggering SA and SSA, increased SA accumulation inhibits RSV replication&quot;	10.1038/ncomms5768
